# Supplementary material
Source: PubMed Central journal article supplement (PMC3301996)
Supplement: 97320630008170S1.pdf [file 97320630008170S1.pdf]

## Supplementary material:

**Table 1:** Comparison of various parameters of ligand molecules obtained by Pharmacophore based similarity searching using ZINC database.

| ZINC ID             | M. Wt. (dalton) | Total Energy(KJ/mol) | H. Bonding Energy(KJ/mol) | xLogP (KJ/mol) | B. affinity(KJ/mol) |
|---------------------|-----------------|----------------------|---------------------------|----------------|---------------------|
| ID-[00]ZINC1025445  | 372.421         | -151.029             | -0.0206                   | 3.61           | -116.398            |
| ID-[01]ZINC1025451  | 371.421         | -158.326             | -0.339                    | 3.61           | -120.465            |
| ID-[02]ZINC5553120  | 292.296         | -117.324             | -8.003                    | 0.01           | -101.15             |
| ID-[03]ZINC636503   | 355.349         | -132.789             | -2.232                    | 4.50           | -113.391            |
| ID-[04]ZINC753995   | 355.349         | -134.974             | -1.350                    | 4.15           | -108.543            |
| ID-[05]ZINC856324   | 415.401         | -153.856             | -1.170                    | 4.21           | -126.366            |
| ID-[06]ZINC856325   | 415.405         | -152.931             | -3.062                    | 4.16           | -122.806            |
| ID-[07]ZINC856326   | 443.455         | -175.99              | -2.17                     | 4.96           | -33.027             |
| ID-[08]ZINC2478323  | 387.347         | -148.81              | -5.322                    | 3.14           | -24.577             |
| ID-[09]ZINC4217469  | 450.69          | -63.444              | -0.2227                   | 4.08           | -88.974             |
| ID-[010]ZINC24890   | 322.409         | -32.576              | -1.086                    | 3.42           | -100.85             |
| ID-[011]ZINC1542199 | 351.471         | -41.799              | -2.670                    | 4.05           | -11.568             |

**Table 2(a) and 2(b):** Previously known ligands and their docking energy (KJ/mol) values used to develop analogues [2].

| Ligands      | AMN082   | PTEB    | CPPHA  | Fenobam | Ro01-6128 | Ro67-7476 | Ro67-4853 | CPCCOEt  |
|--------------|----------|---------|--------|---------|-----------|-----------|-----------|----------|
| Energy value | -145.879 | -142.98 | -139.9 | -133.78 | -129.165  | -129.091  | -126.491  | -126.052 |

**Table 2(b)**

| Ligands      | SIB-1757 | SIB-1893 | MTEP     | 5MPEP   | MPEP    | MPEP-gamma | PHCCC    |
|--------------|----------|----------|----------|---------|---------|------------|----------|
| Energy value | -103.186 | -102.282 | -102.314 | -101.01 | -99.897 | -96.861    | -105.279 |

**Table 3:** Comparison of various parameters of the drug analogues obtained by de novo method and their IUPAC names (by Marvin sketch).

| ID of molecules | IUPAC name of molecules                                                                                                                                                             | M. Wt. (Dalton) | Total Energy(KJ/mol) | H. Bonding Energy(KJ/mol) | xLogP | B.affinity (KJ/mol) |
|-----------------|-------------------------------------------------------------------------------------------------------------------------------------------------------------------------------------|-----------------|----------------------|---------------------------|-------|---------------------|
| ID-result_001   | (4S,6S,8E,12E,14E)-8-(1-carbamoyl-1-en-1-yl)-4-[ethane-1,2-bis(ylium)-1-yl]-6-hydroxy-14-(prop-2-en-1-ylidene)heptadeca-8,11,12-triene-1,2,3,9,17-pentakis(ylium)                   | 387.6           | 159.827              | -5.1906                   | 4.75  | -57.807             |
| ID-result_002   | (4S,6S,8E,12E,14E)-8-(1-carbamoyl-1-en-1-yl)-4-[ethane-1,2-bis(ylium)-1-yl]-6-hydroxy-14-(prop-3-en-1-ylidene)heptadeca-8,11,12-triene-1,2,3,9,17-pentakis(ylium)                   | 387.5           | -164.761             | -5.26                     | 4.76  | -71.44              |
| ID-result_003   | (6R)-1-(ethan-2-yl-1-yl)-2-[(1E,5E,8S)-8-hydroxy-6-[1-(methylcarbamoyl)eth-1-en-1-yl]dodeca-1,2,5-triene-5,11,12-tris(ylium)-1-yl]-4-methylidene-6-methyl-1-cyclohex-2-en-1-ylidene | 399.6           | -169.566             | -6.456                    | 4.41  | -40.10              |
| ID-result_004   | (5S,7E,11E,13E)-5-hydroxy-7-[1-(methylcarbamoyl)eth-1-en-1-yl]-13-(prop-2-en-1-ylidene)hexadeca-7,10,11-triene-1,2,8,16-tetrakis(ylium)                                             | 359.5           | -156.661             | -2.32                     | 4.73  | -121.532            |
| ID-result_005   | (4E,5E)-9-[(1E,2S,5R)-2-[(1Z)-buta-1,3-dien-1-yl-1-yl]-5-[2-(carbamoylamino)-2-oxoethyl]cyclohexan-4-ylidene]-4-(prop-2-en-1-ylidene)nona-5,6-diene-1,9-bis(ylium)                  | 396.6           | -158.947             | -0.557                    | 4.70  | -14.94              |
| ID-result_006   | (3E,7E,9E)-3-[(2R,4R)-2,4-dihydroxyhexyl]-9-(prop-2-en-1-ylidene)dodeca-1,3,6,7-tetraene-1,4,12-tris(ylium)                                                                         | 318.5           | -156.896             | -7.59                     | 4.50  | -107.004            |
| ID-result_007   | (5S,7E,11E,13E)-7-(1-carbamoyl-1-en-1-yl)-5-hydroxy-13-(prop-2-en-1-ylidene)hexadeca-7,10,11-triene-1,2,8,16-tetrakis(ylium)                                                        | 445.5           | -153.66              | -0.73                     | 4.33  | -54.69              |
| ID-result_008   | [(3E,5E,9E,14R,15E)-14-(2-oxoethyl)-4-(propan-3-yl-1-yl)heptadeca-3,5,6,9,15-pentaene-9,10,12,15,16,17-exakis(ylium)-1-yl]urea                                                      | 374.6           | -165.401             | -3.66                     | 4.23  | -130.615            |
| ID-result_009   | [(3E,5E,9E,14R,15E)-14-(2-oxoethyl)-4-(propan-3-yl-1-yl)heptadeca-3,5,6,9,14-pentaene-9,10,12,15,16,17-hexakis(ylium)-1-yl]urea                                                     | 374.6           | -170.744             | -4.833                    | 4.32  | -140.22             |
| ID-result_010   | (4E,6E,10E,12R,17R)-12-ethenyl-17,19-dihydroxy-6-methyl-13-oxo-5-(propan-3-yl-1-yl)nonadeca-4,6,7,10-tetraene-1,10-bis(ylium)                                                       | 392.6           | -156.275             | -9.49                     | 4.56  | -104.845            |
| ID-result_016   | (4E,5E,9E,11S)-12-[(4R)-4-hydroxycyclohex-1-en-2-yl-1-yl]-11-(2-hydroxyethyl)-4-(3-oxopropylidene)trideca-5,6,9,12-tetraene-1,9,10-tris(ylium)                                      | 372.5           | -186.026             | -5.73                     | 4.98  | -110.593            |
| ID-result_025   | [(3E,5E,9E,14R,15E)-14-(2-oxoethyl)-4-(propan-3-yl-1-yl)heptadeca-3,5,6,9,15-pentaene-9,10,12,15,17-pentakis(ylium)-1-yl]urea                                                       | 374.6           | -162.96              | -3.348                    | 4.32  | -85.30              |
| ID-result_056   | (4E,6E,9E)-10-[(3S)-3-[(1S)-1,2-dicarboxyethyl]cyclopent-1-ene-2,4-bis(ylium)-1-yl]-5-(propan-3-yl-1-yl)deca-1,4,6,8,9-pentaene-1,2,7-tris(ylium)                                   | 358.5           | -165.279             | -7.744                    | 4.32  | -104.75             |
| ID-result_078   | (4E,6E,9E)-10-[(3S)-3-[(1R)-1-carboxy-2-hydroxyethyl]cyclopent-1-ene-2,4-bis(ylium)-1-yl]-5-(propan-3-yl-1-yl)deca-1,4,6,8,9-pentaene-1,2,7-tris(ylium)                             | 330.5           | -161.192             | -5.190                    | 5.01  | -108.786            |
| ID-result_101   | [(3R,4E,6S,10E,12E)-11-methyl-6-(2-methylprop-2-en-1-yl)-12-(3-oxopropylidene)pentadeca-4,9,10-triene-1,7,15-tris(ylium)-3-yl]urea                                                  | 388.6           | -162.623             | -2.74                     | 4.05  | -85.424             |
| ID-result_089   | (4E,6E,9E)-10-[(3S)-3-[(1R)-1-carboxy-2-hydroxyethyl]cyclopent-1-ene-2,4-bis(ylium)-1-yl]-5-(propan-3-yl-1-yl)deca-1,4,6,8,9-pentaene-1,2,7-tris(ylium)                             | 320.5           | -159.478             | -4.24                     | 4.95  | -93.99              |
